# Supplementary material for: Monocyte Gene-Expression Profiles Associated With Childhood-Onset Type 1 Diabetes and Disease Risk: A Study of Identical Twins
Source: PubMed Central journal article supplement — Diabetes. 2010 Apr 14;59(7):1751–5. doi: 10.2337/db09-1433 (PMC2889775; doi:10.2337/db09-1433), 2010-04-14
Supplement: supp_db09-1433_db1433onlineappendix.pdf [file supp_db09-1433_db1433onlineappendix.pdf]

**Supplementary Table 1.** Techniques, primers and probes used in Q-PCR analysis

| Public ID Code (NCBI) | Gene Symbol    | Applied Biosystems gene expression assays (Hs)/ Primer/Probe 5'-FAM-3'                                               |
|-----------------------|----------------|----------------------------------------------------------------------------------------------------------------------|
| NM_001037339          | <i>PDE4B</i>   | Hs00387320_m1                                                                                                        |
| NM_000600             | <i>IL6</i>     | Hs00174131_m1                                                                                                        |
| NM_000576             | <i>IL1B</i>    | Hs00174097_m1                                                                                                        |
| NM_002852             | <i>PTX3</i>    | Hs00173615_m1                                                                                                        |
| NM_000963             | <i>PTGS2</i>   | Hs00153133_m1                                                                                                        |
| NM_000594             | <i>TNF</i>     | Hs00174128_m1                                                                                                        |
| NM_006290             | <i>TNFAIP3</i> | Hs00234712_m1                                                                                                        |
| NM_013448             | <i>BAZ1A</i>   | Hs00203772_m1                                                                                                        |
| NM_006273             | <i>CCL7</i>    | Hs00171147_m1                                                                                                        |
| NM_004591             | <i>CCL20</i>   | Hs00355476_m1                                                                                                        |
| NM_002089             | <i>CXCL2</i>   | Hs00236966_m1                                                                                                        |
| NM_002982             | <i>CCL2</i>    | Hs00234140_m1                                                                                                        |
| NM_044472             | <i>CDC42</i>   | Hs00741586_mH                                                                                                        |
| NM_001769             | <i>CD9</i>     | Hs00233521_m1                                                                                                        |
| NM_004603             | <i>STX1A</i>   | Hs00270282_m1                                                                                                        |
| NM_004049             | <i>BCL2A1</i>  | Hs00187845_m1                                                                                                        |
| NM_001423             | <i>EMP1</i>    | Hs00608055_m1                                                                                                        |
| NM_002832             | <i>PTPN7</i>   | Hs00160732_m1                                                                                                        |
| NM_004418             | <i>DUSP2</i>   | Hs00358879_m1                                                                                                        |
| NM_001030287          | <i>ATF3</i>    | Hs00231069_m1                                                                                                        |
| NM_005967             | <i>NAB2</i>    | Hs00195573_m1                                                                                                        |
| NM_002748             | <i>MAPK6</i>   | Hs00833126_g1                                                                                                        |
| NM_004753             | <i>DHRS3</i>   | Hs00191073_m1                                                                                                        |
| NM_001444             | <i>FABP5</i>   | Hs02339439_m1                                                                                                        |
| NM_005345             | <i>HSPA1A</i>  | Probe 1.TTCGAGAGTGACTCCCGTTGTCCCA<br>FPrimer 2.GCTGCGACAGTCCACTACCTT<br>RPrimer 3.GGTTCGCTCTGGGAAGCC                 |
| NM_005157             | <i>ABL</i>     | Probe 1.TGGAGATAACACTCTAAGCATAACTAAAGGT<br>FPrimer 2.CCATTTTTGGTTTGGGCTTCACACCATT<br>RPrimer 3.GATGTAGTTGCTTGGGACCCA |
